# Supplementary material
Source: Research Square preprint supplement (doi:10.21203/rs.3.rs-8821810/v1)
Supplement: Supplementary file 1 [file 52ac938394562bef1f612ef1.xlsx]

## Sheet: Sheet1
GeneSymbol	log2FC	Adjusted P (BH-FDR)	Direction	Hub Gene	Degree (STRING)	Ensembl Protein ID
ABI2	1.11	0	Up		4	9606.ENSP00000261017
ADAM28	1.02	0.0036	Up
ADD1	1.08	0	Up		5	9606.ENSP00000264758
ADH1C	1	0.0316	Up
ADTRP	1.14	0	Up
AGRN	1.16	0	Up		1	9606.ENSP00000368678
AKAP9	1.19	0	Up		2	9606.ENSP00000348573
AKR1B10	1.19	0.0209	Up		3	9606.ENSP00000352584
AKR1C1	1.22	0	Up	Yes	15	9606.ENSP00000370254
ALDH3A1	1.54	0	Up	Yes	11	9606.ENSP00000225740
ALDH3A2	1.03	0	Up	Yes	13	9606.ENSP00000345774
AMOTL2	1.07	0	Up		1	9606.ENSP00000249883
ANXA10	1.11	0.0159	Up
ANXA2P3	1.09	0	Up
APOBEC3A_B	1.07	0	Up
ARHGAP4	1	0	Up		1	9606.ENSP00000359045
ATF6	1.24	0	Up		4	9606.ENSP00000356919
ATP2A3	1.07	0	Up		1	9606.ENSP00000353072
ATP4A	1.16	0.0005	Up		8	9606.ENSP00000262623
ATP4B	1.36	0.0061	Up		5	9606.ENSP00000334216
AUTS2	1	0	Up
AZGP1	1.08	0.0043	Up
AZGP1P1	1.24	0	Up
B3GNT2	1.21	0	Up		5	9606.ENSP00000305595
B4GALT1	1.43	0	Up		2	9606.ENSP00000369055
BAD	1.02	0	Up		2	9606.ENSP00000309103
BAG1	1.05	0	Up		4	9606.ENSP00000420514
BASP1	1.01	0.0004	Up		1	9606.ENSP00000319281
BAZ1B	1.02	0	Up		3	9606.ENSP00000342434
BMP2	1.09	0	Up	Yes	13	9606.ENSP00000368104
BMS1P20	1.08	0.0008	Up
BNIP3	1.04	0.0016	Up		5	9606.ENSP00000357625
BTNL8	1.02	0.0015	Up
C1orf115	1.2	0	Up
CA12	1.28	0	Up
CA2	1.06	0.0102	Up	Yes	11	9606.ENSP00000285379
CA4	1.17	0	Up		1	9606.ENSP00000300900
CA9	1.27	0.0003	Up		1	9606.ENSP00000367608
CACFD1	1.21	0	Up		2	9606.ENSP00000440832
CACNB1	1.17	0	Up		1	9606.ENSP00000377840
CALR	1.06	0	Up		6	9606.ENSP00000320866
CAPN5	1.1	0	Up
CAPN9	1.15	0.0014	Up
CASP1	1.05	0	Up	Yes	12	9606.ENSP00000410076
CASP9	1.06	0	Up	Yes	13	9606.ENSP00000330237
CCL5	1.06	0	Up	Yes	24	9606.ENSP00000293272
CCPG1	1.19	0	Up
CCR7	1.08	0	Up	Yes	19	9606.ENSP00000246657
CCSER2	1.04	0	Up
CD2	1.14	0	Up	Yes	18	9606.ENSP00000358490
CD24	1.05	0.0001	Up
CD3E	1.03	0	Up	Yes	14	9606.ENSP00000354566
CD69	1.03	0	Up	Yes	18	9606.ENSP00000228434
CD79A	1.04	0	Up	Yes	23	9606.ENSP00000221972
CD8A	1.07	0	Up	Yes	11	9606.ENSP00000283635
CEL	1.27	0	Up	Yes	13	9606.ENSP00000361151
CHD9	1.01	0	Up		5	9606.ENSP00000455307
CHMP5	1.05	0	Up		1	9606.ENSP00000223500
CIDEC	1.76	0	Up		2	9606.ENSP00000408631
CLDN18	1.13	0.0142	Up
CLMN	1.04	0	Up
CNTNAP1	1.11	0	Up		1	9606.ENSP00000264638
COL1A1	1.17	0.0006	Up		8	9606.ENSP00000225964
COL4A5	1.03	0.0004	Up		4	9606.ENSP00000331902
COL6A1	1.12	0	Up		2	9606.ENSP00000355180
CR1	1.02	0	Up		6	9606.ENSP00000356016
CRAT	1.04	0	Up		1	9606.ENSP00000315013
CREBZF	1.01	0	Up
CROCC	1.32	0	Up
CSAG2	1.14	0.0025	Up
CSF3R	1.01	0	Up		5	9606.ENSP00000362195
CTAG1A	1.66	0	Up		1	9606.ENSP00000332018
CTAG2	1.54	0	Up		8	9606.ENSP00000247306
CTSE	1.06	0.0056	Up		6	9606.ENSP00000350911
CTSF	1.08	0	Up		3	9606.ENSP00000310832
CTSG	1.06	0	Up		5	9606.ENSP00000216336
CXCL8	1.04	0.0325	Up	Yes	47	9606.ENSP00000306512
CYP17A1	1.03	0	Up		4	9606.ENSP00000358903
CYP2C9	1.1	0.0003	Up	Yes	14	9606.ENSP00000260682
CYP3A5	1.2	0.0012	Up	Yes	13	9606.ENSP00000222982
CYP4F12	1.04	0	Up
CYTIP	1.18	0	Up		1	9606.ENSP00000264192
DAZ4	1.35	0.0051	Up		5	9606.ENSP00000401363
DBNDD1	1.01	0	Up
DCHS2	1.03	0	Up		1	9606.ENSP00000349768
DCLRE1C	1.17	0	Up		2	9606.ENSP00000367527
DDR2	1.07	0	Up		2	9606.ENSP00000356898
DDTL	1.05	0	Up
DDX3Y	1.72	0.0001	Up	Yes	10	9606.ENSP00000336725
DDX52	1.11	0	Up		1	9606.ENSP00000268854
DEFB1	1.34	0.0001	Up		3	9606.ENSP00000297439
DEFB4B	1	0.0035	Up		2	9606.ENSP00000424598
DFFA	1.03	0	Up		3	9606.ENSP00000366237
DGCR6L	1.08	0	Up
DHRS2	1.29	0.0015	Up		3	9606.ENSP00000344674
DHRS9	1.15	0.0001	Up		3	9606.ENSP00000316670
DHTKD1	1.06	0	Up		3	9606.ENSP00000263035
DKFZP434A062	1.02	0	Up
DLG5	1.03	0	Up		3	9606.ENSP00000361467
DNAJB2	1.02	0	Up		2	9606.ENSP00000338019
DNASE1L3	1.22	0	Up		1	9606.ENSP00000316193
DRD2	1.03	0	Up		6	9606.ENSP00000354859
DUOX2	1.05	0.0143	Up
DUSP1	1	0	Up	Yes	12	9606.ENSP00000239223
ECHDC3	1.01	0.0001	Up
EFCAB11	1.07	0	Up		4	9606.ENSP00000326267
EGLN1	1.04	0	Up		2	9606.ENSP00000355601
EIF1AY	1.49	0	Up		7	9606.ENSP00000354722
ENPP4	1.21	0	Up		2	9606.ENSP00000318066
EPHX1	1.11	0	Up		4	9606.ENSP00000272167
FA2H	1.19	0	Up		3	9606.ENSP00000219368
FAM174B	1.17	0	Up
FAM189A2	1.15	0	Up
FAM49A	1	0	Up
FAM63A	1.1	0	Up
FBXL18	1.11	0	Up
FCGR3B	1	0.0008	Up	Yes	18	9606.ENSP00000294800
FECH	1.03	0	Up
FFAR2	1.07	0	Up		2	9606.ENSP00000246549
FGA	1.36	0	Up		5	9606.ENSP00000306361
FGB	1.07	0.0006	Up		5	9606.ENSP00000306099
FLJ42627	1.08	0	Up
FLRT3	1.2	0.0001	Up		1	9606.ENSP00000339912
FMO4	1.09	0	Up		2	9606.ENSP00000356723
FOS	1.09	0.0001	Up	Yes	42	9606.ENSP00000306245
FOSB	1.04	0	Up		6	9606.ENSP00000245919
FOSL2	1.1	0	Up		6	9606.ENSP00000264716
FUT3	1.03	0.0001	Up		4	9606.ENSP00000305603
GABARAPL3	1.01	0	Up		3	9606.ENSP00000394008
GALNT6	1.11	0.0002	Up		3	9606.ENSP00000348668
GAS1	1.04	0.0018	Up
GATA4	1.13	0.0002	Up	Yes	10	9606.ENSP00000334458
GATAD1	1.06	0	Up
GCLM	1.09	0	Up		3	9606.ENSP00000359258
GDF15	1.1	0.0015	Up		3	9606.ENSP00000252809
GDI1	1.19	0	Up		4	9606.ENSP00000394071
GGA2	1.03	0	Up		2	9606.ENSP00000311962
GIF	1.35	0.0273	Up		7	9606.ENSP00000257248
GLUL	1.17	0	Up		4	9606.ENSP00000307900
GP2	1.08	0.0015	Up
GPM6B	1.01	0	Up		1	9606.ENSP00000316861
GPR171	1.12	0	Up
GPRC5B	1.25	0.0001	Up
GPX3	1.28	0	Up
GSN	1.21	0	Up		5	9606.ENSP00000362924
GULP1	1.02	0	Up		1	9606.ENSP00000352047
HBG2	1.04	0.0001	Up		3	9606.ENSP00000338082
HCP5	1.03	0	Up
HIPK2	1.02	0	Up		4	9606.ENSP00000385571
HIST1H2AC	1.05	0	Up		8	9606.ENSP00000321389
HIST2H2BE	1.13	0	Up	Yes	20	9606.ENSP00000358151
HLA-DQB1	1.06	0.0013	Up		5	9606.ENSP00000382034
HLA-DRB4	1.14	0.0274	Up
HLA-DRB6	1.25	0	Up
HMGCS1	1.12	0	Up		3	9606.ENSP00000322706
HPGD	1.28	0.0002	Up		7	9606.ENSP00000296522
HRASLS2	1.56	0.0001	Up
HSPA1B	1.18	0	Up		4	9606.ENSP00000364801
HSPB6	1	0	Up		1	9606.ENSP00000004982
HTATIP2	1.03	0	Up		3	9606.ENSP00000392985
IDS	1.04	0	Up		1	9606.ENSP00000339801
IGFBP5	1.09	0.0003	Up		3	9606.ENSP00000233813
IGHD	1.22	0.0004	Up
IGHM	1.02	0	Up
IGHV3-23	1.02	0.0001	Up
IGHV4-31	1.12	0	Up
IGK	1.25	0.0002	Up
IGKC	1.28	0.0007	Up
IGKV1OR2-108	1.16	0.0003	Up
IGLC1	1.29	0.0002	Up		9	9606.ENSP00000431254
IGLJ3	1.3	0	Up
IGLL5	1.38	0	Up
IL15	1.09	0	Up	Yes	19	9606.ENSP00000296545
IL17RC	1.18	0	Up
IL18R1	1	0	Up		3	9606.ENSP00000233957
IL1B	1.33	0.0002	Up	Yes	40	9606.ENSP00000263341
IL1R2	1.17	0.0035	Up		3	9606.ENSP00000330959
IL1RN	1.08	0	Up		9	9606.ENSP00000259206
INSR	1.14	0	Up	Yes	24	9606.ENSP00000303830
IQGAP2	1	0.0002	Up		2	9606.ENSP00000274364
ITGAX	1.06	0	Up	Yes	29	9606.ENSP00000268296
JARID2	1.07	0	Up		3	9606.ENSP00000341280
KCNE2	1.1	0.0004	Up		1	9606.ENSP00000290310
KCNJ15	1.42	0	Up
KCNJ16	1.14	0.0005	Up
KCNMB3	1.01	0	Up
KDM4B	1.19	0	Up		2	9606.ENSP00000159111
KDM5D	1.76	0	Up		5	9606.ENSP00000444293
KIT	1.07	0	Up	Yes	24	9606.ENSP00000288135
KLF2	1.01	0	Up		7	9606.ENSP00000248071
KLF4	1.22	0	Up		9	9606.ENSP00000363804
KLRD1	1.04	0	Up	Yes	11	9606.ENSP00000338130
KRT10	1.11	0	Up		1	9606.ENSP00000269576
KRT75	1.19	0	Up		1	9606.ENSP00000252245
LCP2	1.19	0	Up	Yes	11	9606.ENSP00000046794
LDB3	1.13	0	Up		5	9606.ENSP00000401437
LIMK2	1.03	0	Up		2	9606.ENSP00000339916
LINC00597	1.18	0	Up
LOC100288570	1.1	0	Up
LOC100509457	1.34	0.0069	Up
LOC101060835	1.34	0	Up
LOC101930400	1.13	0.0002	Up
LOC102724200	1.04	0	Up
LOC202181	1.23	0	Up
LPAR1	1.09	0	Up		9	9606.ENSP00000351755
LRRC31	1.21	0	Up
LSM5	1.23	0	Up		5	9606.ENSP00000410758
LYPLA2	1.06	0	Up
MAGEA1	1.04	0.0003	Up		5	9606.ENSP00000349085
MAGEA10-MAGEA5	1.56	0.0001	Up
MAGEA12	1.73	0.006	Up		3	9606.ENSP00000350592
MAGEA2B	2.01	0	Up		3	9606.ENSP00000333487
MAGEA4	1.56	0.0005	Up		4	9606.ENSP00000276344
MAGEA6	2.03	0.0037	Up		3	9606.ENSP00000329199
MAGEA9B	1.35	0.0001	Up		2	9606.ENSP00000243314
MAGI1	1.07	0	Up
MAL	1.13	0	Up
MAP7	1.1	0	Up
MAPK11	1.01	0	Up	Yes	18	9606.ENSP00000333685
MAPK9	1.07	0	Up	Yes	17	9606.ENSP00000389338
MBIP	1	0	Up
MCF2L-AS1	1.02	0	Up
MDM2	1.07	0	Up		9	9606.ENSP00000417281
METTL7A	1.15	0	Up
MGAM	1.03	0.0001	Up		8	9606.ENSP00000447378
MGLL	1	0.0001	Up		2	9606.ENSP00000265052
MIR4656	1.01	0	Up		1	9606.ENSP00000297562
MIR4680	1.09	0	Up		2	9606.ENSP00000280154
MIR8085	1.1	0	Up
MKRN2	1.01	0	Up		2	9606.ENSP00000170447
MLLT11	1.04	0.0015	Up
MMP13	1.07	0	Up	Yes	13	9606.ENSP00000260302
MMP9	1.09	0.0001	Up	Yes	30	9606.ENSP00000361405
MNDA	1.12	0.0006	Up		4	9606.ENSP00000357123
MPP5	1.19	0	Up		6	9606.ENSP00000261681
MPZL1	1.14	0	Up		3	9606.ENSP00000352513
MSRA	1.21	0	Up
MT1M	1.25	0.0017	Up
MUC1	1.24	0	Up	Yes	12	9606.ENSP00000357380
MUC3B	1.19	0	Up		4	9606.ENSP00000324834
MUC5AC	1.02	0.0292	Up	Yes	11	9606.ENSP00000435591
MYCL	1.02	0	Up
MYCN	1.4	0	Up	Yes	11	9606.ENSP00000281043
MYH14	1.05	0	Up	Yes	19	9606.ENSP00000262269
MYOZ1	1.11	0	Up		1	9606.ENSP00000352272
MZB1	1.22	0	Up		2	9606.ENSP00000303920
NCOR1	1	0	Up		9	9606.ENSP00000268712
NDUFB8	1.05	0	Up		1	9606.ENSP00000299166
NFIC	1.11	0	Up		1	9606.ENSP00000465655
NFKB2	1.2	0	Up	Yes	10	9606.ENSP00000358983
NOX5	1.05	0	Up		2	9606.ENSP00000373518
NR2F2	1.01	0	Up		2	9606.ENSP00000377721
NR3C2	1.32	0	Up		4	9606.ENSP00000341390
NUAK2	1.03	0	Up
OASL	1.14	0.0004	Up	Yes	13	9606.ENSP00000257570
OLFM4	1.16	0.0444	Up		1	9606.ENSP00000219022
ORAI2	1.04	0	Up
ORM1	1.15	0.0004	Up		3	9606.ENSP00000259396
ORM2	1.16	0.0002	Up		3	9606.ENSP00000394936
OSBPL2	1.07	0	Up		1	9606.ENSP00000316649
OSM	1.02	0	Up		9	9606.ENSP00000215781
PAQR6	1.02	0	Up
PCDHGA1	1.11	0	Up
PDCL	1.03	0	Up
PDE4B	1.01	0.0003	Up
PDGFA	1.06	0	Up		4	9606.ENSP00000346508
PDLIM5	1.36	0	Up		4	9606.ENSP00000321746
PDLIM7	1.02	0	Up		3	9606.ENSP00000348099
PDS5B	1.01	0	Up		2	9606.ENSP00000313851
PDZK1IP1	1.16	0.0034	Up
PER3	1.11	0	Up
PEX11A	1.18	0	Up		3	9606.ENSP00000300056
PEX14	1.05	0	Up		1	9606.ENSP00000349016
PGA4	1.83	0.0096	Up		5	9606.ENSP00000367391
PGD	1.09	0	Up		3	9606.ENSP00000270776
PGPEP1	1.07	0	Up
PI15	1.01	0	Up		1	9606.ENSP00000260113
PIP5K1B	1.03	0.0002	Up		3	9606.ENSP00000265382
PIR	1.07	0	Up		2	9606.ENSP00000369785
PKMYT1	1.07	0	Up		2	9606.ENSP00000262300
PKP2	1.05	0.0006	Up		2	9606.ENSP00000070846
PLAC4	1.14	0	Up
PLAC8	1.09	0.0074	Up
PLAUR	1	0	Up	Yes	13	9606.ENSP00000339328
PLCB4	1	0.0003	Up		5	9606.ENSP00000334105
PLEK	1.17	0.0001	Up	Yes	10	9606.ENSP00000234313
PLEKHF1	1.27	0	Up
PLEKHG3	1.06	0	Up
PMS2P1	1.2	0	Up
PNLIPRP2	1.03	0	Up
PON3	1.37	0	Up
PPARGC1A	1.05	0	Up		9	9606.ENSP00000264867
PPDPF	1.19	0	Up
PPP2R5D	1	0	Up		5	9606.ENSP00000417963
PRAF2	1.03	0	Up
PREPL	1.04	0	Up
PROSER1	1.04	0	Up
PRRG2	1.07	0	Up
PRSS2	1.07	0.0009	Up		4	9606.ENSP00000354280
PSCA	1.9	0.0004	Up
PTGER2	1.05	0	Up
PTN	1.07	0.0003	Up
PTP4A1	1.06	0	Up		1	9606.ENSP00000359685
PTPN18	1.1	0	Up		2	9606.ENSP00000175756
PTPN6	1	0	Up	Yes	14	9606.ENSP00000391592
PTPRH	1.02	0.0001	Up		1	9606.ENSP00000365528
PXDC1	1.02	0	Up
PYROXD1	1.02	0	Up
RAB26	1.21	0	Up
RAB27A	1.26	0	Up		4	9606.ENSP00000337761
RABIF	1.1	0	Up
RALGPS1	1.14	0	Up
RALGPS2	1.05	0	Up
RASAL1	1.28	0	Up		2	9606.ENSP00000450244
RBFOX1	1.01	0	Up
RCBTB1	1.07	0	Up
RELA	1.01	0	Up	Yes	25	9606.ENSP00000384273
RFK	1.1	0	Up
RHOH	1.03	0	Up		2	9606.ENSP00000371219
RND1	1.11	0	Up		3	9606.ENSP00000308461
RNF19B	1.07	0	Up
RNF24	1.13	0	Up
RPL38	1.16	0	Up		3	9606.ENSP00000309830
RPS4Y1	1.6	0.002	Up	Yes	11	9606.ENSP00000250784
RPS6KA5	1.15	0	Up		7	9606.ENSP00000261991
RUBCN	1.07	0	Up		1	9606.ENSP00000296343
RUSC2	1.02	0	Up
S100A8	1.08	0	Up	Yes	10	9606.ENSP00000357721
S100A9	1.29	0.0008	Up		6	9606.ENSP00000357727
SCARB2	1.13	0	Up	Yes	13	9606.ENSP00000264896
SCGB2A1	1.39	0.0017	Up
SCIN	1.18	0	Up		2	9606.ENSP00000297029
SCNN1A	1.04	0.0013	Up		3	9606.ENSP00000353292
SCNN1B	1.24	0	Up		3	9606.ENSP00000345751
SECISBP2L	1.13	0	Up
SECTM1	1.07	0	Up
SELE	1.01	0.002	Up	Yes	14	9606.ENSP00000331736
SELENBP1	1.04	0.0001	Up		1	9606.ENSP00000357861
SELL	1.09	0.0002	Up	Yes	21	9606.ENSP00000236147
SELPLG	1.05	0	Up		8	9606.ENSP00000228463
SF3A2	1.06	0	Up		6	9606.ENSP00000221494
SGK2	1.22	0	Up		3	9606.ENSP00000340608
SH3BP2	1.15	0	Up		6	9606.ENSP00000422168
SIM2	1.06	0	Up
SLC12A9	1.1	0	Up
SLC25A44	1.01	0	Up
SLC29A1	1.11	0	Up
SLC2A14	1.22	0.0001	Up
SLC2A3	1.03	0.001	Up		1	9606.ENSP00000075120
SLC38A6	1.18	0	Up
SLC4A4	1.09	0.0037	Up		2	9606.ENSP00000393557
SLC50A1	1.06	0	Up
SMAP1	1.05	0	Up
SMARCA1	1.16	0	Up		6	9606.ENSP00000360163
SMC5	1.08	0	Up	Yes	10	9606.ENSP00000354957
SMG7	1	0	Up		2	9606.ENSP00000425133
SMPD3	1.2	0	Up
SORT1	1.34	0	Up		4	9606.ENSP00000256637
SOSTDC1	1.48	0.0005	Up		1	9606.ENSP00000304930
SSR1	1.15	0	Up		3	9606.ENSP00000244763
STAT1	1.01	0	Up	Yes	24	9606.ENSP00000354394
STXBP2	1.08	0	Up		3	9606.ENSP00000221283
STYK1	1.17	0.0001	Up		4	9606.ENSP00000075503
SUCLG2	1.05	0	Up		4	9606.ENSP00000419325
SULT1B1	1.19	0	Up
SULT1C2	1.25	0.0072	Up		1	9606.ENSP00000319622
SYNGR3	1.16	0	Up
TCIRG1	1.01	0	Up		4	9606.ENSP00000265686
TCL1A	1.32	0	Up		2	9606.ENSP00000385036
TFCP2L1	1.18	0	Up
TFEB	1.04	0	Up
TFF2	1.23	0.0082	Up		3	9606.ENSP00000291526
TGOLN2	1.02	0	Up		4	9606.ENSP00000386443
TIMP2	1.01	0	Up		6	9606.ENSP00000262768
TKTL1	1.46	0	Up		4	9606.ENSP00000358931
TLR3	1.01	0.0001	Up	Yes	13	9606.ENSP00000296795
TMCO1	1.09	0	Up
TMEM104	1.09	0	Up
TMEM140	1.04	0	Up
TMEM259	1.1	0	Up
TMPRSS2	1.03	0	Up		1	9606.ENSP00000381588
TMPRSS3	1.1	0.0002	Up
TNFAIP2	1.07	0	Up		2	9606.ENSP00000332326
TNFAIP6	1.11	0.002	Up		5	9606.ENSP00000243347
TNFRSF14	1.02	0	Up		4	9606.ENSP00000347948
TNFRSF17	1.05	0.0038	Up		3	9606.ENSP00000053243
TNFSF12-TNFSF13	1.04	0	Up
TNFSF14	1.02	0	Up		4	9606.ENSP00000469049
TRBC1	1.21	0	Up
TRIM16	1.09	0	Up
TRPM3	1.16	0	Up
TSKU	1.03	0	Up
TSPY1	1.12	0	Up		9	9606.ENSP00000403304
TTLL5	1.02	0	Up
TXLNGY	1.04	0.0003	Up
UAP1L1	1.06	0	Up		1	9606.ENSP00000386935
UBL3	1.16	0	Up
UGDH	1.1	0	Up	Yes	12	9606.ENSP00000319501
UGT1A1	1.07	0.002	Up	Yes	12	9606.ENSP00000304845
UGT1A3	1.12	0.0012	Up	Yes	11	9606.ENSP00000418532
URI1	1.24	0	Up		1	9606.ENSP00000442436
VAMP2	1.14	0	Up		6	9606.ENSP00000314214
VIPR2	1.05	0	Up
VNN2	1.12	0	Up		5	9606.ENSP00000322276
VNN3	1.03	0	Up		1	9606.ENSP00000440594
WFDC2	1.07	0.0007	Up
WIPI1	1.03	0	Up		3	9606.ENSP00000262139
WWOX	1.07	0	Up		4	9606.ENSP00000457230
YBX2	1.07	0	Up
ZBTB43	1.03	0	Up
ZNF117	1.38	0	Up
ZNF204P	1.14	0	Up
ZNF217	1.22	0	Up		1	9606.ENSP00000304308
ZNF580	1.11	0	Up
