# Supplementary material
Source: Research Square preprint supplement (doi:10.21203/rs.3.rs-8821810/v1)
Supplement: Supplementary file 2 [file 966cc5c16295952a92474c34.xlsx]

## Sheet: KEGG_ORA
KEGG ID	Pathway	Count	Adjusted P-value	Genes
hsa00053	Ascorbate and aldarate metabolism	11	1.9143e-09	ALDH3A2;UGDH;UGT1A10;UGT1A1;UGT1A5;UGT1A4;UGT1A3;UGT1A9;UGT1A8;UGT1A7;UGT1A6
hsa00040	Pentose and glucuronate interconversions	12	1.9143e-09	ALDH3A2;UGDH;UGT1A10;AKR1B10;UGT1A1;UGT1A5;UGT1A4;UGT1A3;UGT1A9;UGT1A8;UGT1A7;UGT1A6
hsa00980	Metabolism of xenobiotics by cytochrome P450	15	8.23081e-09	UGT1A10;ADH1C;UGT1A1;AKR1C1;EPHX1;CYP3A5;CYP2C9;ALDH3A1;UGT1A5;UGT1A4;UGT1A3;UGT1A9;UGT1A8;UGT1A7;UGT1A6
hsa00982	Drug metabolism - cytochrome P450	14	2.33006e-08	UGT1A10;ADH1C;UGT1A1;FMO4;CYP3A5;CYP2C9;ALDH3A1;UGT1A5;UGT1A4;UGT1A3;UGT1A9;UGT1A8;UGT1A7;UGT1A6
hsa00140	Steroid hormone biosynthesis	13	2.33006e-08	UGT1A10;UGT1A1;AKR1C1;AKR1C2;CYP3A5;CYP17A1;UGT1A5;UGT1A4;UGT1A3;UGT1A9;UGT1A8;UGT1A7;UGT1A6
hsa05204	Chemical carcinogenesis	15	2.33006e-08	UGT1A10;ADH1C;UGT1A1;EPHX1;AKR1C2;CYP3A5;CYP2C9;ALDH3A1;UGT1A5;UGT1A4;UGT1A3;UGT1A9;UGT1A8;UGT1A7;UGT1A6
hsa05164	Influenza A	21	2.73841e-08	PRSS1;HLA-DRB5;HLA-DRB4;CXCL8;STAT1;TMPRSS2;RELA;CASP9;MAPK11;MAPK9;IL1B;CCL5;CASP1;HLA-DRB3;PRSS2;HSPA1B;HLA-DRB1;TLR3;HLA-DQA1;HSPA1A;HLA-DQB1
hsa05140	Leishmaniasis	14	3.4234e-08	HLA-DRB5;CR1;HLA-DRB4;STAT1;FOS;RELA;MAPK11;FCGR3B;IL1B;PTPN6;HLA-DRB3;HLA-DQA1;HLA-DRB1;HLA-DQB1
hsa00830	Retinol metabolism	13	6.97212e-08	UGT1A10;ADH1C;UGT1A1;CYP3A5;CYP2C9;DHRS9;UGT1A5;UGT1A4;UGT1A3;UGT1A9;UGT1A8;UGT1A7;UGT1A6
hsa00860	Porphyrin and chlorophyll metabolism	10	7.44867e-07	UGT1A10;UGT1A1;FECH;UGT1A5;UGT1A4;UGT1A3;UGT1A9;UGT1A8;UGT1A7;UGT1A6
hsa00500	Starch and sucrose metabolism	11	1.18069e-06	UGDH;UGT1A10;MGAM;UGT1A1;UGT1A5;UGT1A4;UGT1A3;UGT1A9;UGT1A8;UGT1A7;UGT1A6
hsa04640	Hematopoietic cell lineage	13	2.35452e-06	HLA-DRB5;CSF3R;CR1;HLA-DRB4;IL1R2;CD3E;CD2;CD8A;IL1B;KIT;CD24;HLA-DRB3;HLA-DRB1
hsa05323	Rheumatoid arthritis	13	2.85221e-06	HLA-DRB5;CXCL8;HLA-DRB4;IL15;TNFSF13;FOS;TCIRG1;IL1B;CCL5;HLA-DRB3;HLA-DQA1;HLA-DRB1;HLA-DQB1
hsa05134	Legionellosis	10	8.07536e-06	CASP9;CXCL8;CR1;IL1B;BNIP3;CASP1;HSPA1B;RELA;HSPA1A;NFKB2
hsa05145	Toxoplasmosis	14	9.95402e-06	HLA-DRB5;HLA-DRB4;BAD;STAT1;RELA;CASP9;MAPK11;MAPK9;HLA-DRB3;HSPA1B;HLA-DRB1;HLA-DQA1;HSPA1A;HLA-DQB1
hsa05152	Tuberculosis	17	1.30792e-05	HLA-DRB5;HLA-DRB4;CR1;BAD;STAT1;TCIRG1;RELA;CASP9;MAPK11;MAPK9;FCGR3B;IL1B;ITGAX;HLA-DRB3;HLA-DRB1;HLA-DQA1;HLA-DQB1
hsa00983	Drug metabolism - other enzymes	9	1.30792e-05	UGT1A10;UGT1A1;UGT1A5;UGT1A4;UGT1A3;UGT1A9;UGT1A8;UGT1A7;UGT1A6
hsa04672	Intestinal immune network for IgA production	9	1.80465e-05	HLA-DRB5;HLA-DRB4;IL15;TNFSF13;TNFRSF17;HLA-DRB3;HLA-DRB1;HLA-DQA1;HLA-DQB1
hsa05168	Herpes simplex infection	17	1.88041e-05	HLA-DRB5;HLA-DRB4;TNFSF14;IL15;STAT1;FOS;RELA;MAPK9;PER3;IL1B;CCL5;TNFRSF14;HLA-DRB3;HLA-DRB1;TLR3;HLA-DQA1;HLA-DQB1
hsa04612	Antigen processing and presentation	11	1.88041e-05	HLA-DRB5;HLA-DRB4;CD8A;KLRD1;CALR;HLA-DRB3;HSPA1B;HLA-DQA1;HLA-DRB1;HLA-DQB1;HSPA1A
hsa05321	Inflammatory bowel disease (IBD)	10	2.67854e-05	HLA-DRB5;HLA-DRB4;STAT1;IL1B;HLA-DRB3;IL18R1;RELA;HLA-DQA1;HLA-DRB1;HLA-DQB1
hsa05332	Graft-versus-host disease	8	4.20412e-05	HLA-DRB5;HLA-DRB4;IL1B;KLRD1;HLA-DRB3;HLA-DRB1;HLA-DQA1;HLA-DQB1
hsa05150	Staphylococcus aureus infection	9	5.41335e-05	HLA-DRB5;FCGR3B;HLA-DRB4;SELPLG;KRT10;HLA-DRB3;HLA-DQA1;HLA-DRB1;HLA-DQB1
hsa04514	Cell adhesion molecules (CAMs)	14	5.76467e-05	HLA-DRB5;CNTNAP1;HLA-DRB4;SELPLG;SELE;CD2;SELL;CD8A;CLDN18;HLA-DRB3;HLA-DRB1;MPZL1;HLA-DQA1;HLA-DQB1
hsa04668	TNF signaling pathway	12	9.11493e-05	MAPK11;MAPK9;RPS6KA5;IL15;IL1B;CCL5;BCL3;FOS;SELE;MMP9;RELA;IL18R1
hsa00910	Nitrogen metabolism	5	0.000298322	CA12;CA2;CA4;CA9;GLUL
hsa04940	Type I diabetes mellitus	7	0.00048075	HLA-DRB5;HLA-DRB4;IL1B;HLA-DRB3;HLA-DRB1;HLA-DQA1;HLA-DQB1
hsa05310	Asthma	6	0.000582055	HLA-DRB5;HLA-DRB4;HLA-DRB3;HLA-DRB1;HLA-DQA1;HLA-DQB1
hsa04933	AGE-RAGE signaling pathway in diabetic complications	10	0.000990533	COL1A1;MAPK11;MAPK9;CXCL8;PLCB4;STAT1;IL1B;COL4A5;SELE;RELA
hsa05142	Chagas disease (American trypanosomiasis)	10	0.00122303	MAPK11;MAPK9;CXCL8;PLCB4;IL1B;CCL5;CALR;FOS;CD3E;RELA
hsa04060	Cytokine-cytokine receptor interaction	17	0.00126704	CSF3R;CXCL8;TNFSF14;IL15;IL1R2;TNFSF12;TNFSF13;OSM;PDGFA;BMP2;IL1B;CCL5;KIT;TNFRSF17;CCR7;TNFRSF14;IL18R1
hsa05330	Allograft rejection	6	0.0016647	HLA-DRB5;HLA-DRB4;HLA-DRB3;HLA-DRB1;HLA-DQA1;HLA-DQB1
hsa04380	Osteoclast differentiation	11	0.00188616	MAPK11;MAPK9;FCGR3B;STAT1;IL1B;FOSB;LCP2;FOS;RELA;NFKB2;FOSL2
hsa04621	NOD-like receptor signaling pathway	7	0.00236939	MAPK11;MAPK9;CXCL8;IL1B;CCL5;CASP1;RELA
hsa05416	Viral myocarditis	7	0.0028542	CASP9;HLA-DRB5;HLA-DRB4;HLA-DRB3;HLA-DQA1;HLA-DRB1;HLA-DQB1
hsa04620	Toll-like receptor signaling pathway	9	0.00540402	MAPK11;MAPK9;CXCL8;STAT1;IL1B;CCL5;FOS;RELA;TLR3
hsa05132	Salmonella infection	8	0.00559132	MAPK11;MAPK9;CXCL8;IL1B;CASP1;MYH14;FOS;RELA
hsa05169	Epstein-Barr virus infection	13	0.00575038	HLA-DRB5;HLA-DRB4;RELA;NFKB2;MAPK11;MAPK9;MDM2;HLA-DRB3;HSPA1B;HLA-DRB1;HLA-DQA1;HSPA1A;HLA-DQB1
hsa04974	Protein digestion and absorption	8	0.00715172	COL1A1;PRSS1;COL6A1;COL4A5;PGA3;PRSS2;PGA5;PGA4
hsa05322	Systemic lupus erythematosus	10	0.0073339	HLA-DRB5;HLA-DRB4;FCGR3B;CTSG;HLA-DRB3;HIST1H2AC;HIST2H2BE;HLA-DRB1;HLA-DQA1;HLA-DQB1
hsa05320	Autoimmune thyroid disease	6	0.00806307	HLA-DRB5;HLA-DRB4;HLA-DRB3;HLA-DQA1;HLA-DRB1;HLA-DQB1
hsa04971	Gastric acid secretion	7	0.00931975	ATP4B;ATP4A;PLCB4;KCNE2;CA2;KCNJ15;KCNJ16
hsa05133	Pertussis	7	0.0096199	MAPK11;MAPK9;CXCL8;IL1B;CASP1;FOS;RELA
hsa04972	Pancreatic secretion	8	0.0096199	PNLIPRP2;PRSS1;PLCB4;CA2;ATP2A3;CEL;PRSS2;SLC4A4
hsa05146	Amoebiasis	8	0.0121796	COL1A1;CXCL8;PLCB4;IL1R2;IL1B;COL4A5;CTSG;RELA
hsa05200	Pathways in cancer	19	0.0129233	EGLN1;CSF3R;CXCL8;BAD;STAT1;PTGER2;LPAR1;PDGFA;FOS;MMP9;RELA;NFKB2;CASP9;MAPK9;BMP2;PLCB4;KIT;MDM2;COL4A5
hsa04660	T cell receptor signaling pathway	8	0.0147157	MAPK11;MAPK9;CD8A;PTPN6;LCP2;FOS;CD3E;RELA
hsa05166	HTLV-I infection	14	0.0147157	HLA-DRB5;HLA-DRB4;IL15;IL1R2;PDGFA;FOS;CD3E;RELA;NFKB2;CALR;HLA-DRB3;HLA-DRB1;HLA-DQA1;HLA-DQB1
hsa05202	Transcriptional misregulation in cancer	11	0.015804	MYCN;NCOR1;CXCL8;HPGD;IL1R2;MDM2;PDGFA;TMPRSS2;CCR7;MMP9;RELA
hsa04966	Collecting duct acid secretion	4	0.015804	ATP4B;ATP4A;CA2;TCIRG1
hsa05120	Epithelial cell signaling in Helicobacter pylori infection	6	0.0231099	MAPK11;MAPK9;CXCL8;CCL5;TCIRG1;RELA
hsa04151	PI3K-Akt signaling pathway	16	0.0291816	CSF3R;BAD;INSR;LPAR1;OSM;PDGFA;PPP2R5D;RELA;COL1A1;CASP9;TCL1A;KIT;COL6A1;MDM2;COL4A5;SGK2
hsa04917	Prolactin signaling pathway	6	0.0293868	MAPK11;MAPK9;STAT1;FOS;RELA;CYP17A1
hsa04010	MAPK signaling pathway	13	0.0303643	DUSP1;IL1R2;PDGFA;FOS;RELA;NFKB2;CACNB1;MAPK11;MAPK9;RPS6KA5;IL1B;HSPA1B;HSPA1A
hsa05161	Hepatitis B	9	0.0310417	CASP9;MAPK9;CXCL8;BAD;STAT1;FOS;MMP9;RELA;TLR3
hsa04142	Lysosome	8	0.0342613	GGA2;SCARB2;SORT1;IDS;CTSG;CTSF;TCIRG1;CTSE
hsa01100	Metabolic pathways	42	0.0375936	PON3;UGT1A10;PNLIPRP2;NDUFB8;B4GALT1;FECH;ADH1C;TCIRG1;CYP3A5;CYP17A1;FUT3;SMPD3;RFK;UAP1L1;UGT1A5;IDS;UGT1A4;PIP5K1B;UGT1A3;UGT1A9;UGT1A8;GLUL;UGT1A7;UGT1A6;GALNT6;TKTL1;MGAM;HMGCS1;UGT1A1;CEL;PGD;ALDH3A2;CYP2C9;UGDH;ALDH3A1;PLCB4;AKR1B10;DHRS9;SUCLG2;B3GNT2;GCLM;MGLL
hsa04145	Phagosome	9	0.0410729	HLA-DRB5;HLA-DRB4;FCGR3B;CALR;TCIRG1;HLA-DRB3;HLA-DRB1;HLA-DQA1;HLA-DQB1
hsa05340	Primary immunodeficiency	4	0.0419533	CD79A;DCLRE1C;CD8A;CD3E
hsa00561	Glycerolipid metabolism	5	0.047164	ALDH3A2;PNLIPRP2;AKR1B10;CEL;MGLL
hsa05160	Hepatitis C	8	0.0475305	MAPK11;MAPK9;CXCL8;BAD;STAT1;CLDN18;RELA;TLR3
hsa04960	Aldosterone-regulated sodium reabsorption	4	0.0475305	INSR;SCNN1B;SCNN1A;NR3C2
hsa04068	FoxO signaling pathway	8	0.0475305	MAPK11;MAPK9;GABARAPL1;INSR;BNIP3;MDM2;SGK2;KLF2

## Sheet: GO_BP_ORA
GO ID	Term_name	Count	Adjusted P-value	Genes
GO:0052696	flavonoid glucuronidation	9	4.13698e-11	UGT1A10;UGT1A1;UGT1A5;UGT1A4;UGT1A3;UGT1A9;UGT1A8;UGT1A7;UGT1A6
GO:0052697	xenobiotic glucuronidation	9	4.3662e-10	UGT1A10;UGT1A1;UGT1A5;UGT1A4;UGT1A3;UGT1A9;UGT1A8;UGT1A7;UGT1A6
GO:0052695	cellular glucuronidation	9	5.68229e-08	UGT1A10;UGT1A1;UGT1A5;UGT1A4;UGT1A3;UGT1A9;UGT1A8;UGT1A7;UGT1A6
GO:0050851	antigen receptor-mediated signaling pathway	26	1.76467e-07	IGHM;IGHV4-31;IGHV3-23;CD3E;RELA;IGHG3;CD79A;IGHG4;IGHG1;IGKC;TRBC1;PDE4B;IGLC1;IGHA1;IGHA2;HLA-DQA1;BTNL8;HLA-DRB5;HLA-DRB4;IGLL5;IGHD;LCP2;MNDA;HLA-DRB3;HLA-DRB1;HLA-DQB1
GO:0006911	"phagocytosis, engulfment"	17	1.76467e-07	SCARB2;IGHM;IGHV4-31;GSN;IGHV3-23;RHOH;GULP1;IGHG3;IGHG4;IGLL5;IGHG1;IGKC;TRBC1;IGHD;IGLC1;IGHA1;IGHA2
GO:0099024	plasma membrane invagination	16	8.67227e-07	SCARB2;IGHM;IGHV4-31;GSN;IGHV3-23;GULP1;IGHG3;IGHG4;IGLL5;IGHG1;IGKC;TRBC1;IGHD;IGLC1;IGHA1;IGHA2
GO:0019585	glucuronate metabolic process	7	5.84419e-06	UGT1A10;UGT1A1;UGT1A4;UGT1A3;UGT1A9;UGT1A7;UGT1A6
GO:0050853	B cell receptor signaling pathway	15	5.84419e-06	IGHM;IGHV4-31;IGHV3-23;IGHG3;CD79A;IGHG4;IGLL5;IGHG1;IGKC;TRBC1;IGHD;IGLC1;MNDA;IGHA1;IGHA2
GO:0050864	regulation of B cell activation	14	1.18105e-05	IGHM;IGHV4-31;IGHV3-23;IGHG3;IGHG4;IGLL5;IGHG1;IGKC;TRBC1;IGHD;MZB1;IGLC1;IGHA1;IGHA2
GO:0006909	phagocytosis	16	2.36145e-05	SCARB2;IGHM;IGHV4-31;GSN;IGHV3-23;GULP1;IGHG3;IGHG4;IGLL5;IGHG1;IGKC;TRBC1;IGHD;IGLC1;IGHA1;IGHA2
GO:0019221	cytokine-mediated signaling pathway	38	2.36145e-05	IL1RN;CSF3R;CXCL8;RELA;OASL;IGHG4;IGHG1;MUC1;RPS6KA5;FLRT3;CCL5;CASP1;ITGAX;TNFRSF17;TNFRSF14;DUOX2;HLA-DQA1;HLA-DRB5;HLA-DRB4;TNFSF14;IL15;STAT1;IL1R2;TNFSF12;TNFSF13;OSM;FOS;IL17RC;MMP9;IL1B;KIT;PDCD4;TFF2;PTPN6;HLA-DRB3;HLA-DRB1;IL18R1;HLA-DQB1
GO:0051251	positive regulation of lymphocyte activation	14	2.80812e-05	IGHM;IGHV4-31;IGHV3-23;IGHG3;IGHG4;IGLL5;IGHG1;IGKC;TRBC1;IGHD;CCR7;IGLC1;IGHA1;IGHA2
GO:0002455	humoral immune response mediated by circulating immunoglobulin	15	4.26125e-05	IGHM;IGHV4-31;IGHV3-23;IGHG3;IGHG4;IGLL5;IGHG1;IGKC;IGLV1-44;TRBC1;IGHD;IGLC1;IGHA1;IGHA2;HLA-DQB1
GO:0002283	neutrophil activation involved in immune response	31	6.44807e-05	ORM1;B4GALT1;TNFAIP6;STXBP2;SLC2A3;TCIRG1;IQGAP2;ORM2;PLAC8;FCGR3B;ITGAX;TIMP2;CTSG;ENPP4;METTL7A;PRSS2;MGAM;CR1;GSN;PLAUR;RAB27A;OLFM4;MMP9;SELL;MNDA;PTPN6;DNASE1L3;S100A9;HSPA1B;S100A8;HSPA1A
GO:0042742	defense response to bacterium	20	0.000150762	IGHM;IGHV4-31;IGHV3-23;DEFB1;HIST2H2BE;IGHG3;IGHG4;IGLL5;IGHG1;IGKC;TRBC1;IGHD;CTSG;IGLC1;DEFB4A;IGHA1;IGHA2;S100A9;S100A8;TLR3
GO:0043312	neutrophil degranulation	30	0.000150762	ORM1;B4GALT1;TNFAIP6;STXBP2;SLC2A3;TCIRG1;IQGAP2;ORM2;PLAC8;FCGR3B;ITGAX;TIMP2;CTSG;ENPP4;METTL7A;PRSS2;MGAM;CR1;GSN;PLAUR;RAB27A;OLFM4;MMP9;SELL;MNDA;PTPN6;S100A9;HSPA1B;S100A8;HSPA1A
GO:0006958	"complement activation, classical pathway"	14	0.000157378	IGHM;IGHV4-31;IGHV3-23;IGHG3;IGHG4;IGLL5;IGHG1;IGKC;IGLV1-44;TRBC1;IGHD;IGLC1;IGHA1;IGHA2
GO:0019731	antibacterial humoral response	8	0.000171741	FGB;FGA;IGHM;CTSG;DEFB1;IGHA1;IGHA2;HIST2H2BE
GO:0002446	neutrophil mediated immunity	30	0.000171741	ORM1;B4GALT1;TNFAIP6;STXBP2;SLC2A3;TCIRG1;IQGAP2;ORM2;PLAC8;FCGR3B;ITGAX;TIMP2;CTSG;ENPP4;METTL7A;PRSS2;MGAM;CR1;GSN;PLAUR;RAB27A;OLFM4;MMP9;SELL;MNDA;PTPN6;S100A9;HSPA1B;S100A8;HSPA1A
GO:0050727	regulation of inflammatory response	16	0.000214461	TNFAIP6;IL15;KLF4;SELE;RELA;GPRC5B;DDT;CCL5;CASP1;PDCD4;FFAR2;DNASE1L3;S100A9;MGLL;S100A8;TLR3
GO:0050871	positive regulation of B cell activation	13	0.000488534	IGHM;IGHV4-31;IGHV3-23;IGHG3;IGHG4;IGLL5;IGHG1;IGKC;TRBC1;IGHD;IGLC1;IGHA1;IGHA2
GO:2001235	positive regulation of apoptotic signaling pathway	10	0.0011925	MLLT11;WWOX;GSN;BAD;BNIP3;TNFSF12;PLAUR;MMP9;S100A9;S100A8
GO:0008202	steroid metabolic process	11	0.00209553	CYP2C9;WWOX;DHRS9;UGT1A1;AKR1C1;AKR1C2;TFCP2L1;CYP3A5;DHRS2;UGT1A8;CYP17A1
GO:0042573	retinoic acid metabolic process	5	0.00226835	UGT1A1;UGT1A3;UGT1A9;UGT1A8;UGT1A7
GO:0071345	cellular response to cytokine stimulus	26	0.00254241	IL1RN;CSF3R;CXCL8;SELPLG;RELA;IGHG4;IGHG1;MUC1;TCL1A;FLRT3;CCL5;CASP1;ITGAX;CCR7;DUOX2;PTPN18;STAT1;IL1R2;OSM;FOS;MMP9;MAPK11;IL1B;KIT;PTPN6;IL18R1
GO:0055078	sodium ion homeostasis	6	0.00265915	ATP4B;ATP4A;SCNN1B;TMPRSS3;SCNN1A;CYP4F12
GO:0032787	monocarboxylic acid metabolic process	11	0.00401249	SCARB2;CYP2C9;FA2H;UGT1A1;VNN2;VNN3;AKR1C1;UGT1A3;UGT1A9;UGT1A8;UGT1A7
GO:0050704	regulation of interleukin-1 secretion	4	0.00449369	ORM1;IGHD;CCR7;ORM2
GO:0001523	retinoid metabolic process	9	0.00522888	AKR1B10;DHRS9;UGT1A1;AKR1C1;UGT1A3;AGRN;UGT1A9;UGT1A8;UGT1A7
GO:0071310	cellular response to organic substance	12	0.00538016	MAPK11;MAPK9;PTPN18;URI1;IGFBP5;CCL5;IL1B;CASP1;CCR7;PTPN6;KLF4;IL18R1
GO:0032757	positive regulation of interleukin-8 production	7	0.00552635	CD2;ZNF580;IL1B;FFAR2;HSPA1B;TLR3;HSPA1A
GO:0034114	regulation of heterotypic cell-cell adhesion	5	0.00559245	FGB;FGA;IL1RN;IL1B;KLF4
GO:0006954	inflammatory response	17	0.00663401	ORM1;CXCL8;TNFAIP6;PTGER2;FOS;SELE;RELA;NFKB2;BMP2;CCL5;IL1B;KIT;CCR7;TNFRSF14;S100A9;MGLL;S100A8
GO:0030198	extracellular matrix organization	16	0.00687091	FGB;FGA;PRSS1;PDGFA;MMP9;COL1A1;MMP13;COL6A1;ITGAX;TIMP2;COL4A5;CTSG;AGRN;PRSS2;GPM6B;DDR2
GO:0045948	positive regulation of translational initiation	5	0.00812615	CCL5;DAZ4;DAZ3;DAZ2;DAZ1
GO:0042448	progesterone metabolic process	4	0.00812615	DHRS9;AKR1C1;AKR1C2;CYP17A1
GO:0002673	regulation of acute inflammatory response	11	0.00817437	IGHG3;IGHG4;IGHG1;CR1;IGKC;IGHV3-23;IGLV1-44;OSM;FFAR2;IGLC1;DNASE1L3
GO:0042127	regulation of cell proliferation	34	0.00817437	CXCL8;PDGFA;PDS5B;PTN;TCIRG1;RELA;DNAJB2;TCL1A;SCIN;SSR1;TNFRSF14;DRD2;HIST1H2AC;IL15;INSR;STYK1;TNFSF13;OSM;AKR1C2;KLF4;DHRS2;AZGP1;BMP2;CCPG1;DLG5;IL1B;KIT;MDM2;MZB1;PTPN6;CALR;SGK2;HSPA1B;HSPA1A
GO:0008207	C21-steroid hormone metabolic process	5	0.009403	DHRS9;AKR1C1;AKR1C2;DHRS2;CYP17A1
GO:0071985	multivesicular body sorting pathway	4	0.0135865	RUBCN;SORT1;RAB27A;CHMP5
GO:0060333	interferon-gamma-mediated signaling pathway	8	0.0135865	HLA-DRB5;HLA-DRB4;STAT1;HLA-DRB3;HLA-DQA1;HLA-DRB1;HLA-DQB1;OASL
GO:0010107	potassium ion import	6	0.0143376	ATP4B;ATP4A;KCNE2;KCNJ15;KCNJ16;SLC12A9
GO:0050729	positive regulation of inflammatory response	8	0.0169688	GPRC5B;DDT;IL15;OSM;PDCD4;S100A9;S100A8;TLR3
GO:0031349	positive regulation of defense response	8	0.0181126	GPRC5B;DDT;IL15;CCL5;PDCD4;S100A9;S100A8;TLR3
GO:0090200	positive regulation of release of cytochrome c from mitochondria	5	0.0181126	MLLT11;BAD;BNIP3;PLAUR;MMP9
GO:0034599	cellular response to oxidative stress	10	0.0190067	MAPK9;GPX3;PYROXD1;NOX5;FOS;DHRS2;MMP9;PPARGC1A;HSPA1B;HSPA1A
GO:0071346	cellular response to interferon-gamma	10	0.0199281	HLA-DRB5;HLA-DRB4;STAT1;CCL5;CASP1;HLA-DRB3;HLA-DQA1;HLA-DRB1;HLA-DQB1;OASL
GO:0050852	T cell receptor signaling pathway	12	0.0223941	BTNL8;HLA-DRB5;HLA-DRB4;TRBC1;PDE4B;LCP2;CD3E;HLA-DRB3;HLA-DQA1;HLA-DRB1;RELA;HLA-DQB1
GO:0006508	proteolysis	17	0.0241845	PRSS1;TMPRSS3;TMPRSS2;PGA3;MMP9;PGA5;WFDC2;PGA4;CAPN9;CAPN5;CASP1;MDM2;CTSG;CTSF;CTSE;PGPEP1;PRSS2
GO:0050716	positive regulation of interleukin-1 secretion	5	0.0271752	ORM1;CASP1;IGHD;TRIM16;ORM2
GO:0070486	leukocyte aggregation	3	0.0286758	IL1B;S100A9;S100A8
GO:1903265	positive regulation of tumor necrosis factor-mediated signaling pathway	3	0.0286758	CASP1;HSPA1B;HSPA1A
GO:0070935	3'-UTR-mediated mRNA stabilization	4	0.029435	DAZ4;DAZ3;DAZ2;DAZ1
GO:1903428	positive regulation of reactive oxygen species biosynthetic process	5	0.029435	IL1B;INSR;RAB27A;KLF4;KLF2
GO:0045055	regulated exocytosis	11	0.0309843	FGB;FGA;ORM1;SCIN;RAB26;PLEK;STXBP2;PDGFA;SYNGR3;ORM2;VAMP2
GO:0042981	regulation of apoptotic process	34	0.0317068	CD3E;RELA;CASP9;MAPK9;TCL1A;NUAK2;SCIN;BAG1;CASP1;TNFRSF14;HTATIP2;DFFA;BAD;DUSP1;GDF15;STAT1;BNIP3;INSR;PLAUR;DHRS2;MMP9;CIDEC;MLLT11;BMP2;BCL3;KIT;GAS1;MNDA;CALR;ATF6;SGK2;HSPA1B;DDR2;HSPA1A
GO:0010604	positive regulation of macromolecule metabolic process	16	0.0327453	GSN;ZNF580;RAB27A;CD3E;KLF4;SELE;KLF2;MAPK11;MAPK9;BMP2;MYCN;IL1B;ADTRP;HSPA1B;TLR3;HSPA1A
GO:2001242	regulation of intrinsic apoptotic signaling pathway	6	0.0327563	URI1;BAD;PLAUR;MMP9;S100A9;S100A8
GO:0030647	aminoglycoside antibiotic metabolic process	3	0.033307	AKR1B10;AKR1C1;AKR1C2
GO:0071260	cellular response to mechanical stimulus	6	0.033307	TNFSF14;BAD;BNIP3;IL1B;CASP1;TLR3
GO:0046683	response to organophosphorus	4	0.033307	STAT1;AKR1C1;TRIM16;DUOX2
GO:0070613	regulation of protein processing	10	0.033307	IGHG3;IGHG4;IGHG1;CR1;IGKC;IGHV3-23;IGLV1-44;GAS1;IGLC1;MAGEA3
GO:0060267	positive regulation of respiratory burst	3	0.033307	INSR;IGHA1;IGHA2
GO:0044598	doxorubicin metabolic process	3	0.033307	AKR1B10;AKR1C1;AKR1C2
GO:0044597	daunorubicin metabolic process	3	0.033307	AKR1B10;AKR1C1;AKR1C2
GO:0002221	pattern recognition receptor signaling pathway	6	0.033307	FGB;FGA;FFAR2;S100A9;S100A8;TLR3
GO:0008284	positive regulation of cell proliferation	21	0.0354149	BAD;IL15;STAT1;INSR;TNFSF13;OSM;AKR1C2;PDGFA;PTN;TCIRG1;RELA;BMP2;TCL1A;CCPG1;CCL5;IL1B;MDM2;SSR1;PTPN6;CALR;DDR2
GO:0006915	apoptotic process	14	0.0377624	TNFSF14;BAD;BNIP3;TNFSF12;CIDEC;CASP9;CD2;IL1B;RFK;CASP1;PDCD4;MAL;NOX5;PTPN6
GO:0032677	regulation of interleukin-8 production	5	0.0402054	ZNF580;IL1B;HSPA1B;TLR3;HSPA1A
GO:0050706	regulation of interleukin-1 beta secretion	5	0.0402054	ORM1;CASP1;CCR7;TRIM16;ORM2
GO:2001267	regulation of cysteine-type endopeptidase activity involved in apoptotic signaling pathway	3	0.0434711	GSN;PLAUR;MMP9
GO:0002920	regulation of humoral immune response	9	0.0442361	IGHG3;IGHG4;IGHG1;CR1;IGKC;IGHV3-23;IGLV1-44;CCR7;IGLC1
GO:1902532	negative regulation of intracellular signal transduction	11	0.0462558	URI1;DUSP1;STAT1;DLG5;PLEK;MDM2;PLAUR;RHOH;DRD2;MMP9;RELA
GO:0035066	positive regulation of histone acetylation	4	0.0468536	MUC1;RPS6KA5;IL1B;PPARGC1A
GO:0045744	negative regulation of G-protein coupled receptor protein signaling pathway	4	0.0468536	CXCL8;CCL5;PLEK;DRD2
GO:0034097	response to cytokine	10	0.0469352	PTPN18;STAT1;CASP1;TIMP2;CCR7;PTPN6;SELE;IL18R1;RELA;NFKB2
GO:0030195	negative regulation of blood coagulation	5	0.0472488	FGB;FGA;PLAUR;PDGFA;ADTRP
GO:0050715	positive regulation of cytokine secretion	7	0.0489496	CD2;MAPK11;ORM1;IGHD;FFAR2;DRD2;ORM2
